# Supplementary material
Source: Elsevier journal article supplement (https://publikationen.ub.uni-frankfurt.de/opus4/files/43019/mmc2.docx)
Supplement: mmc2 [file mmc2.docx]

|  | Motion trajectory γ- fail rates (mean ± 1 SD) (%) | | | | | |
| --- | --- | --- | --- | --- | --- | --- |
|  | **3%/3mm** | | **2%/2mm** | | **1%/1mm** | |
|  | **No motion correction** | **With adaptation** | **No motion correction** | **With adaptation** | **No motion correction** | **With adaptation** |
| **Lung** |  |  |  |  |  |  |
| **Robotic** | 9.8 (±15.0) | 0.1 (±0.1)* | 20.5 (±23.1) | 0.7 (±0.7)* | 30.6 (±29.0) | 9.1 (±14.7)* |
| **Gimbaled** | 8.6 (±12.5) | 0.7 (±1.0)* | 10.7 (±8.5) | 2.9 (±2.9) | 44.5 (±7.9) | 36.6 (±10.2) |
| **MLC** | 3.0 (±4.4) | 0.7 (±1.4) | 10.2 (±10.1) | 2.1 (±2.1)* | 36.1 (±13.5) | 6.7 (±3.8)* |
| **Couch** | 6.3 (±9.3) | 0.0 (±0.1)* | 16.0 (±15.2) | 0.7 (±1.2)* | 44.3 (±13.9) | 6.4 (±7.8)* |
| **Prostate** |  |  |  |  |  |  |
| **Robotic** | 4.6 (±3.6) | 0.8 (±0.8) | 13.1 (±9.5) | 3.4 (±3.2) | 39.3 (±21.8) | 16.2 (±11.3)* |
| **Gimbaled** | 6.0 (±10.2) | 0.4 (±0.2) | 19.3 (±16.1) | 3.2 (±3.0)* | 53.4 (±12.1) | 17.3 (±17.3)* |
| **MLC** | 6.9 (±6.7) | 0.5 (±1.4)* | 18.2 (±13.9) | 1.5 (±2.5)* | 42.2 (±22.0) | 7.8 (±6.0)* |
| **Couch** | 5.5 (±5.0) | 0.0 (±0.1)* | 12.6 (±9.6) | 1.0 (±1.9)* | 32.0 (±20.8) | 5.4 (±7.7)* |

Supplemental table 2. Mean (mean ± 1 SD) percentage of points that failed the 3%/3mm, 2%2mm and 1%1mm γ -tests with and without adaptation for each of the adaptation systems (all motion trace results combined). * indicate Wilcoxon sign rank p-values < 0.05 for the adaptation to no motion correction pairs
